# Supplementary material
Source: PubMed Central journal article supplement (PMC2902163)

**Supporting Information for**  
**“Mapping of Lysine Methylation and Acetylation in Core Histones**  
**in *Neurospora crassa*”**

*(Biochemistry, 2010, Volume 49, bi-2010-001322)*

by

Lei Xiong, Keyur K. Adhvaryu, Eric U. Selker, and Yinsheng Wang

### List of Supporting Figures:

**Figure S1.** The HPLC chromatogram for the separation of *Neurospora* core histones. Histones were eluted in the order of H2B, H4, H2A and H3.

**Figure S2.** Sequence coverage for the *Neurospora* core histones based on MS/MS analyses (Histones H2B, H2A, H3 and H4 are shown in panels A, B, C, and D, respectively). The sequences for *Neurospora* core histones were obtained from Swissprot, and the identified peptides produced by different proteases were underlined with different colors. The identified modification sites are shown in bold.

**Figure S3.** The MS/MS of the tri-methylated, mono-acetylated (A) and penta-methylated, mono-acetylated (B) tryptic peptide containing residues 1-12 of *Neurospora* H2B. The data were obtained on the Agilent Q-TOF mass spectrometer.

**Figure S4.** The MS/MS of the Asp-N produced peptide containing residues 25-34 of *Neurospora* histone H2B (A) and the Arg-C-produced peptide containing residues 6-19 of *Neurospora* histone H2A (B). The data were acquired on LTQ.

**Figure S5.** The MS of the Arg-C-produced *Neurospora* H3 peptides with residues 3-8 (A) and 73-83 (B). The MS/MS of the H3 peptides containing residues 3-8 with K4 being tri-methylated (C), residues 73-83 with K79 being di-methylated (D), residues 54-63 with K56 being acetylated (E), and residues 9-26 with K9, K14, K18 and K23 being acetylated (F). All data were acquired on the Q-TOF instrument.

**Figure S6.** The selected-ion chromatograms (SICs) of the triply-charged ions of the tri-methylated (A) and acetylated (B) histone H3 peptide with residues 9-17. These two peptides displayed different retention times during LC-MS/MS analysis on the Q-TOF mass spectrometer.

**Figure S7.** The MS of the Arg-C-produced histone H3 peptide bearing residues 27-42 with K36 being tri-methylated and with K27 being tri-methylated (A) or acetylated (B). The MS/MS of the hexa-methylated (C) or tri-methylated, acetylated (D) peptides 27-41 obtained on the Q-TOF.

**Figure S8.** (A) The MS of Arg-C-produced phosphorylated histone H3 peptide with residues 9-17. (B) The MS/MS of the peptide containing residues 9-17 with K9 being acetylated and S10 being phosphorylated. The spectra were obtained on the Q-TOF instrument.

**Figure S9.** (A) The MALDI-MS of the Asp-N-produced *Neurospora* H4 peptide with residues 1-23. (B) The ETD-MS/MS of the same peptide with the N-terminus and K16 being acetylated and K20 being tri-methylated.

**Figure S10.** The QTOF-produced MS/MS of the trypsin-produced *Neurospora* H4 peptides with residues 4-12 (A) and 9-17 (B) supporting the K5, K8, K12 and K16 acetylation.

**Table S1.** The fragment ion mass comparison of 3 example peptides to differentiate tri-methylation from acetylation by using MS/MS data acquired on the Agilent 6510 Q-TOF mass spectrometer. For each modification site, two b or y ions flanking the target lysine were chosen. The experimental mass difference (Measured  $\Delta$ Mass) of these two neighboring b or y ions was calculated, so were the corresponding theoretical mass differences with the lysine being tri-methylated or acetylated (Calcd.  $\Delta$ Mass, ac/me3). The two mass deviations (M.D.) between the measured and calculated mass differences were further calculated, with one being markedly smaller than the other. The modification type at the target lysine could be determined as the one with smaller deviation.

| Peptide      | Modification | Chosen ions | Measured mass 1 | Measured mass 2 | Measured $\Delta$ Mass | Calcd. $\Delta$ Mass,ac | M.D. /ppm   | Calcd. $\Delta$ Mass,me3 | M.D. /ppm  |
|--------------|--------------|-------------|-----------------|-----------------|------------------------|-------------------------|-------------|--------------------------|------------|
| H2B:<br>1-24 | K7 Ac        | b6, b7      | 648.3682        | 818.4735        | 170.1053               | 170.1056                | <b>1.8</b>  | 170.1420                 | 215.8      |
|              | K12 Ac       | b10, b13    | 1114.6640       | 1442.8390       | 328.1749               | 328.1747                | <b>-0.7</b> | 328.2111                 | 110.2      |
|              | K19 Ac       | y3, y6      | 373.2076        | 701.3801        | 328.1725               | 328.1747                | <b>6.7</b>  | 328.2111                 | 117.6      |
| H3:<br>9-26  | K9 Ac        | b2          | 0               | 258.1442        | 258.1442               | 258.1449                | <b>2.7</b>  | 258.1813                 | 143.7      |
|              | K14 Ac       | b7, b5      | 473.2375        | 714.3794        | 241.1419               | 241.1427                | <b>3.4</b>  | 241.1791                 | 154.3      |
|              | K18 Ac       | y5, y11     | 574.3299        | 1309.7710       | 735.4409               | 735.4392                | <b>-2.3</b> | 735.4756                 | 47.2       |
| H4:<br>1-23  | K23 Ac       | y1, y5      | 175.1182        | 574.3299        | 399.2117               | 399.2118                | <b>0.2</b>  | 399.2482                 | 91.4       |
|              | K20 3Me      | b17, b22    | 1786.0630       | 2475.5320       | 689.4683               | 689.4337                | -50.1       | 689.4701                 | <b>2.7</b> |
|              | K16 Ac       | y2, y11     | 288.1968        | 1375.866        | 1087.6700              | 1087.6727               | <b>2.9</b>  | 1087.7090                | 36.3       |

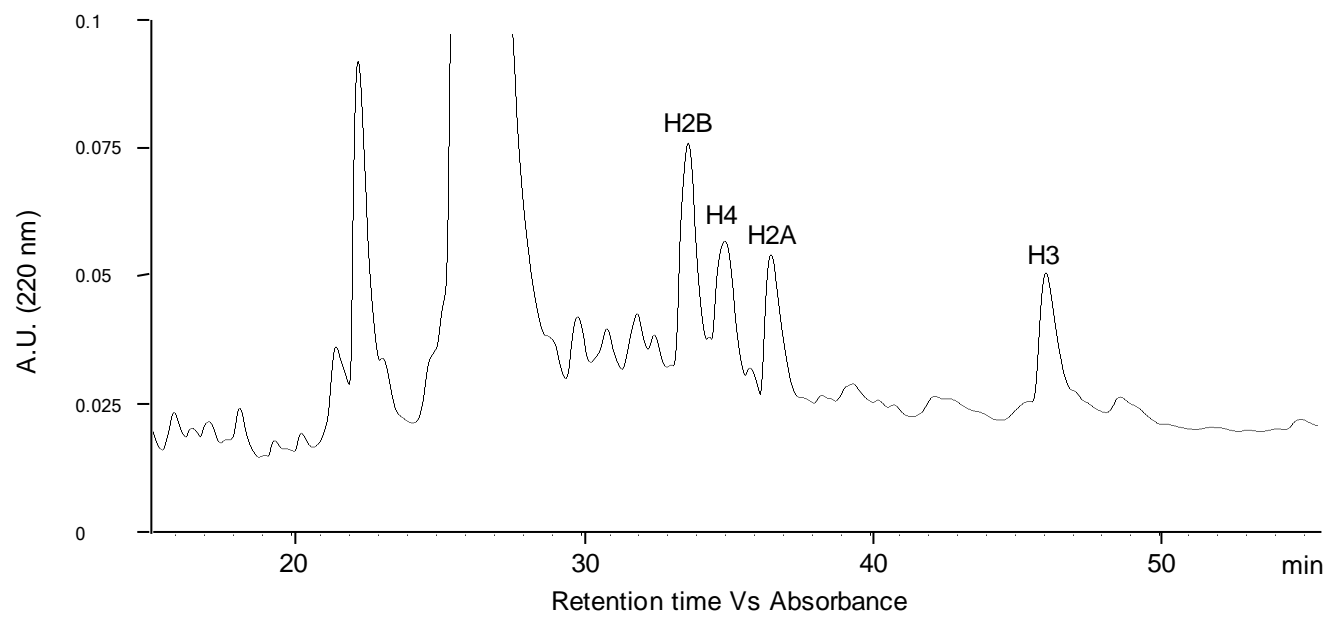

Figure S1

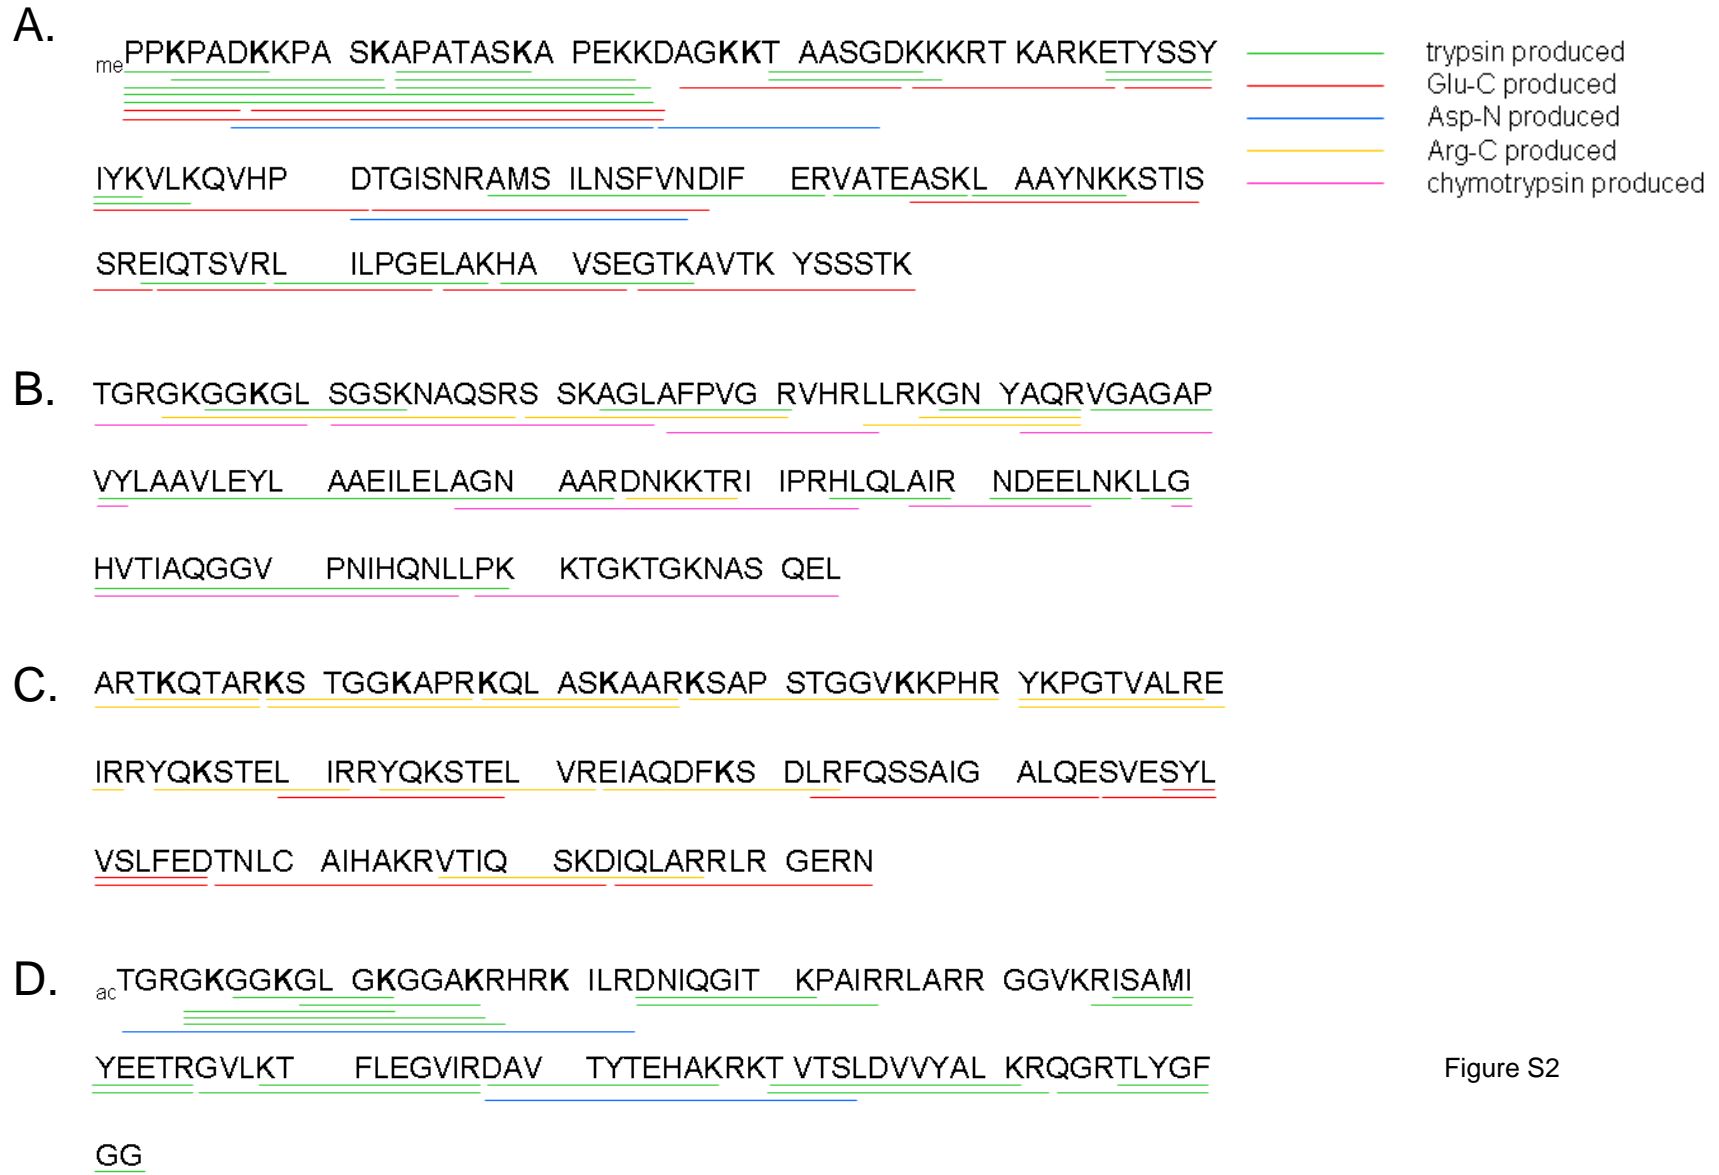

Figure S2

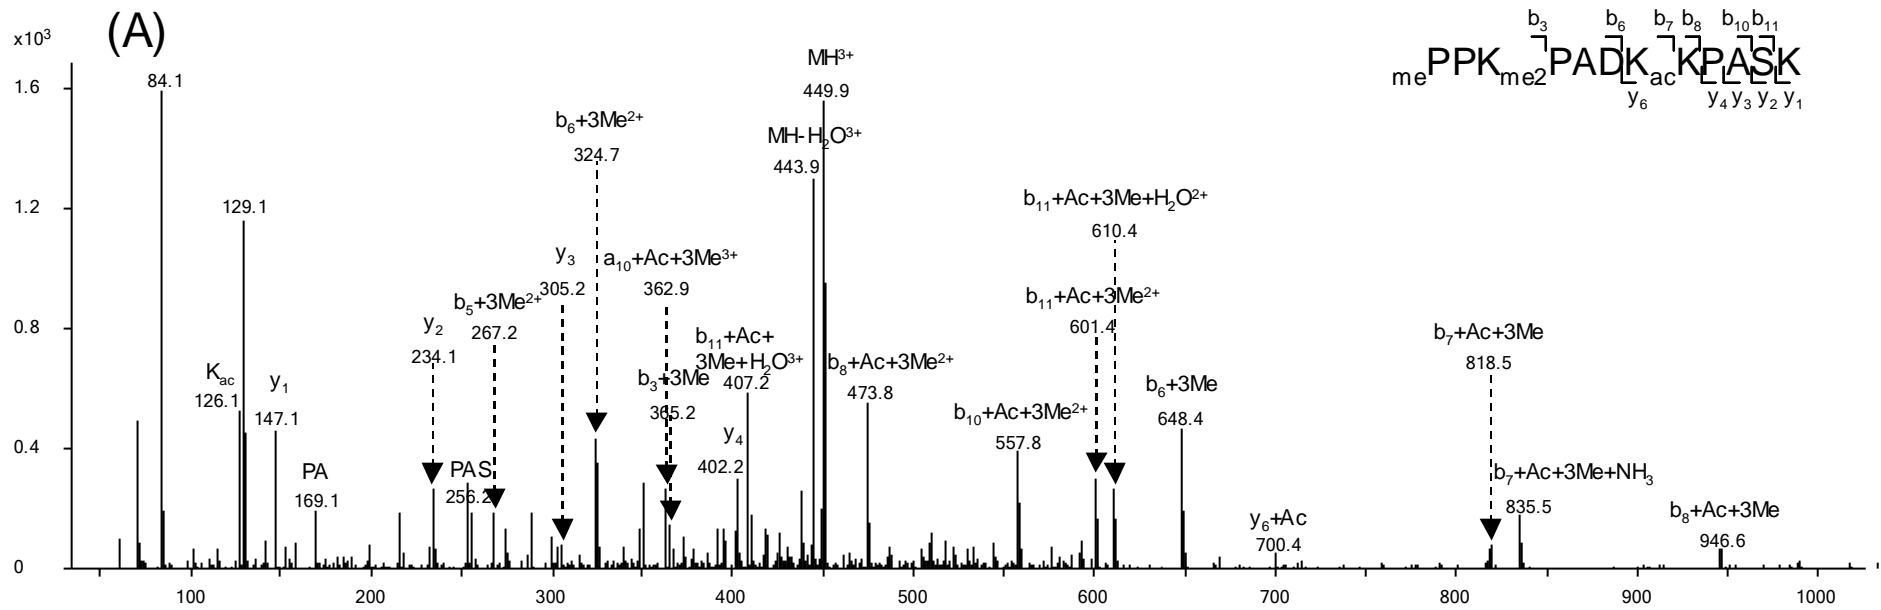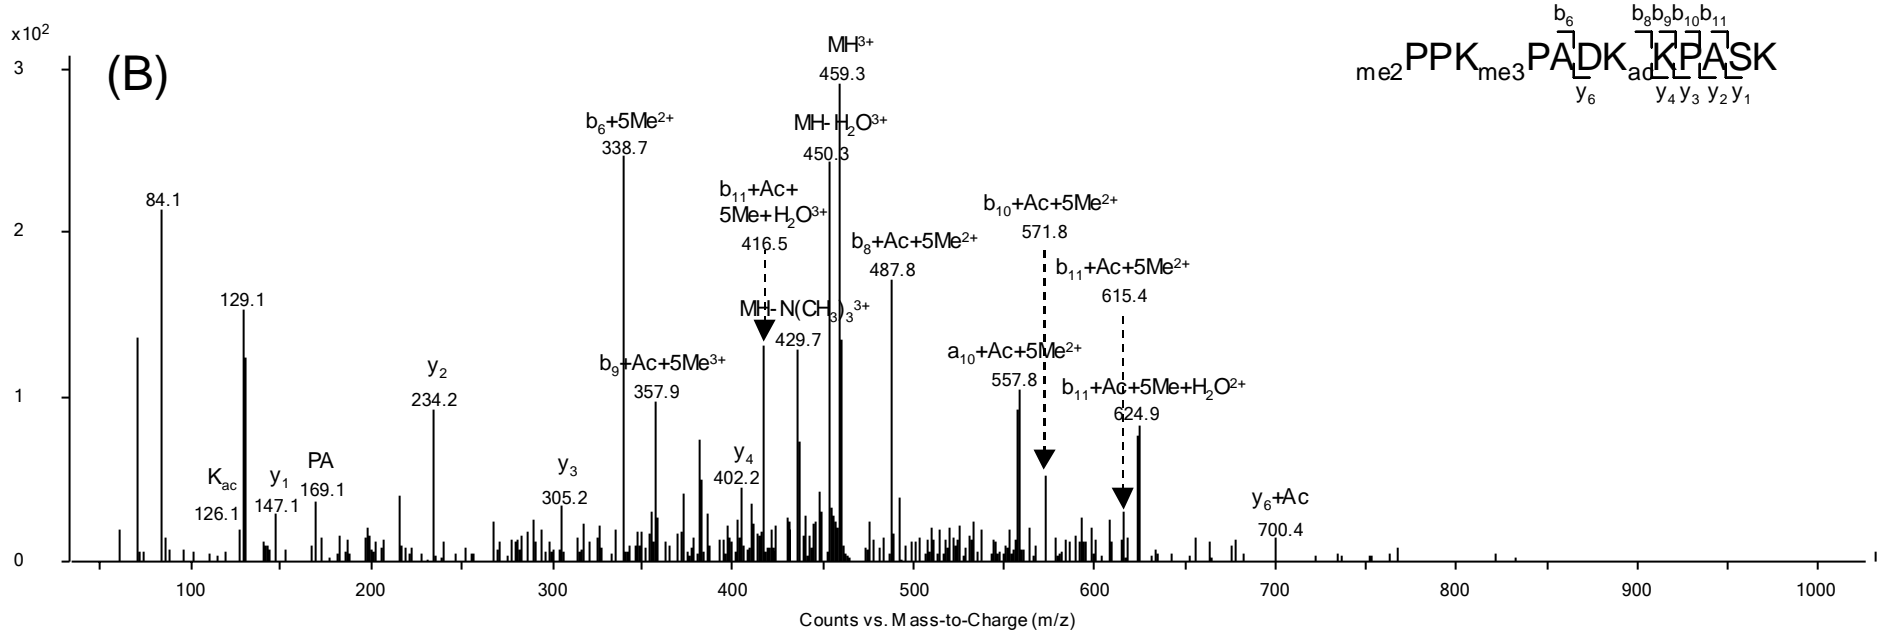

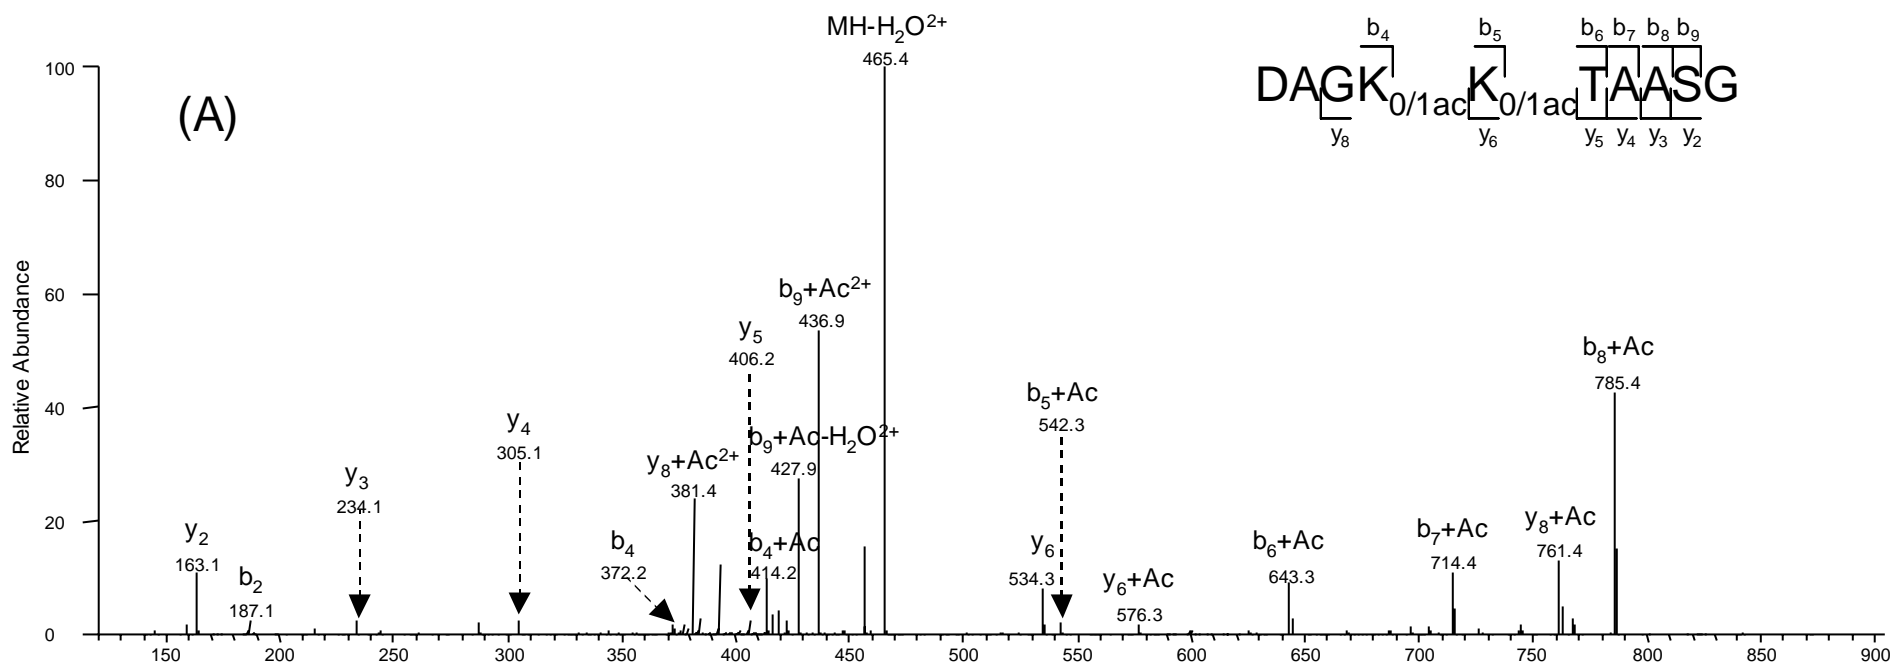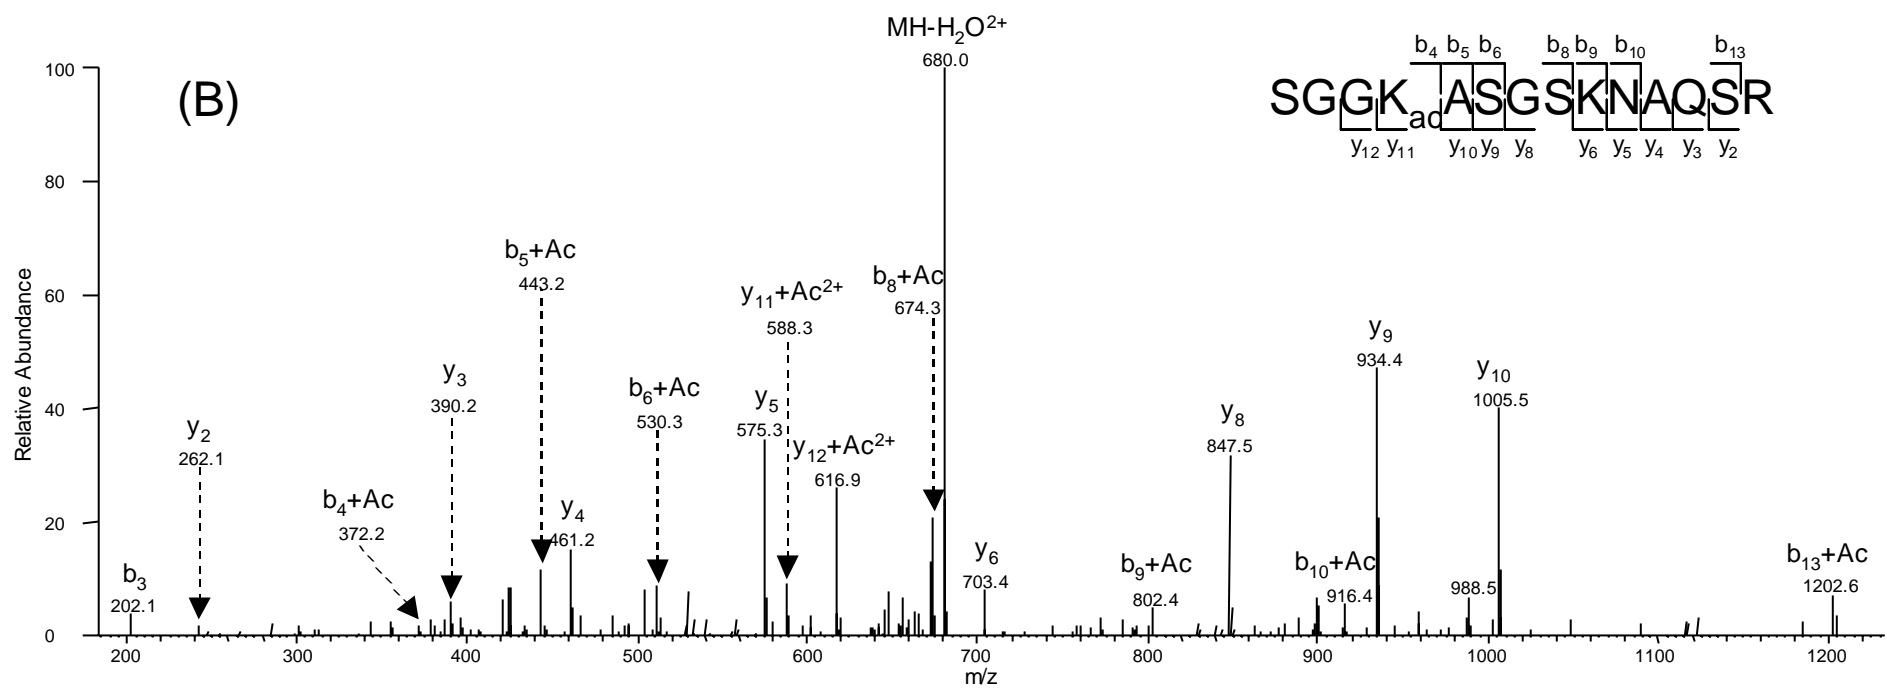



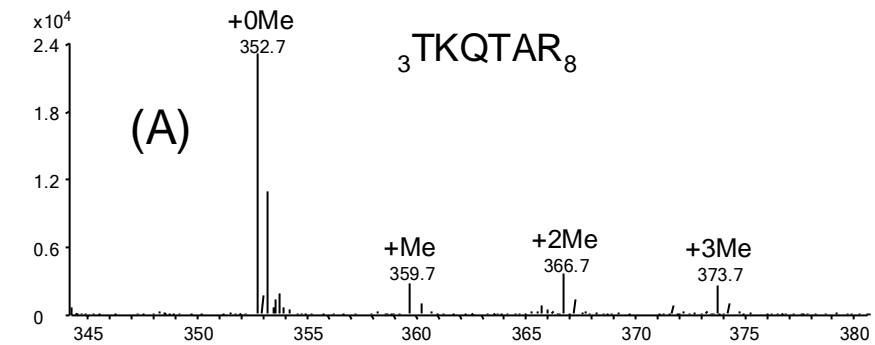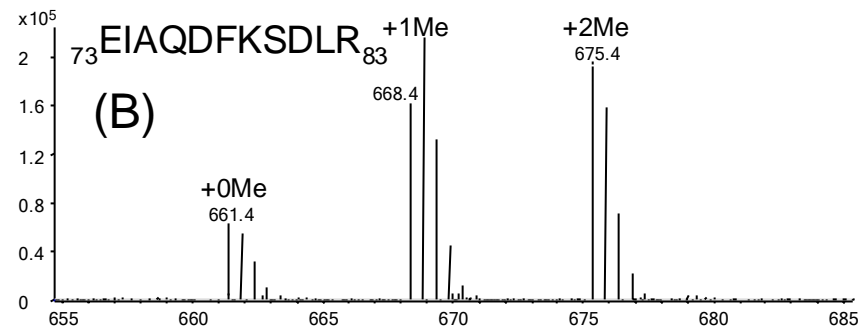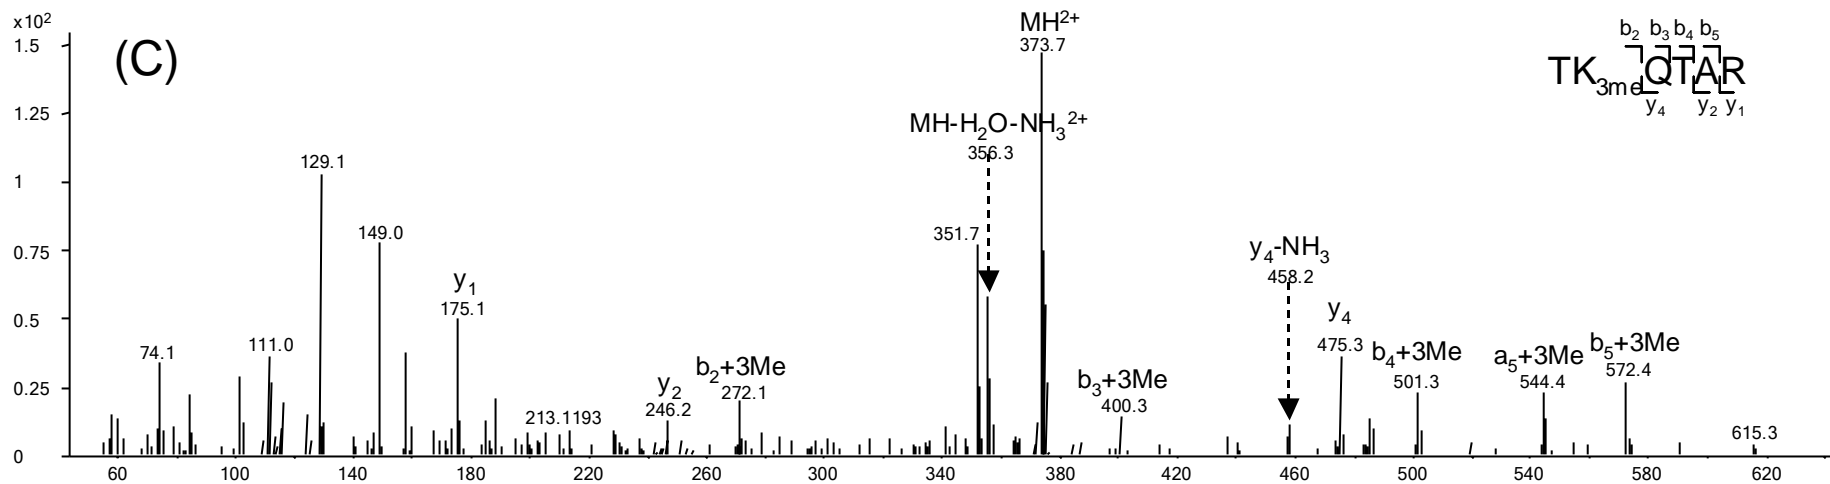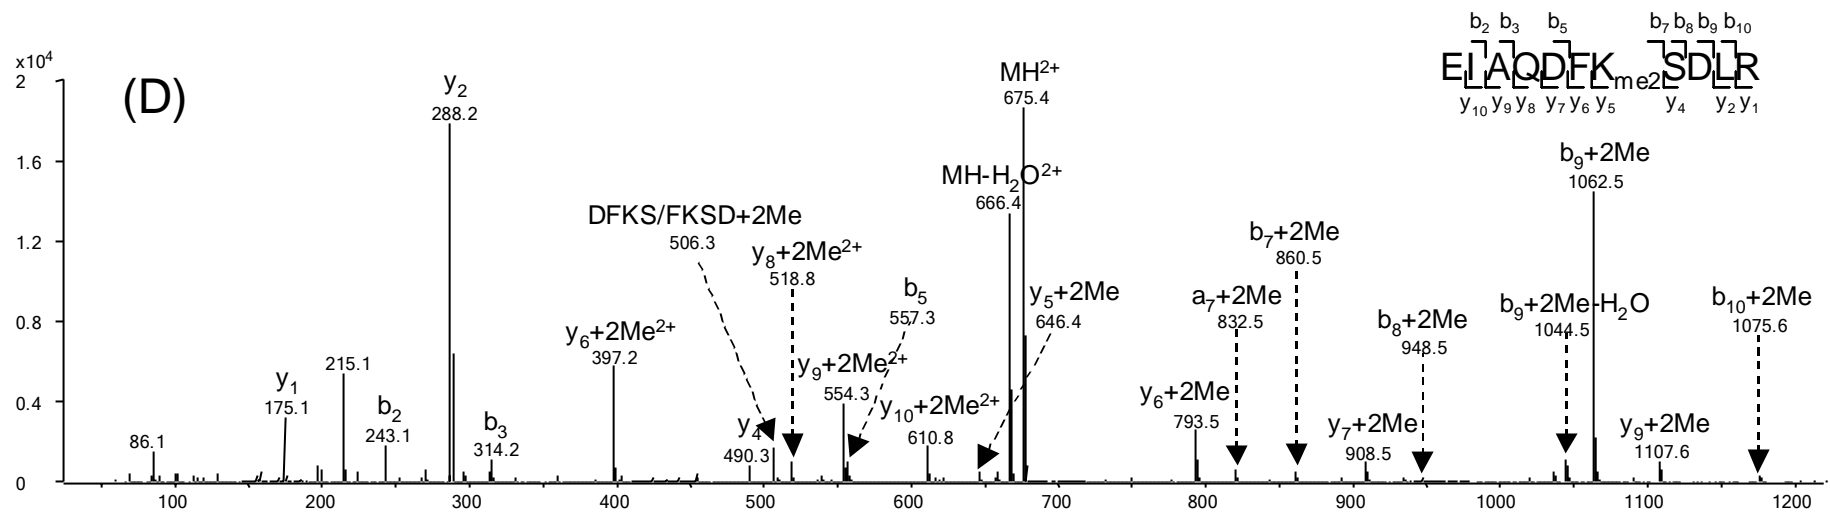

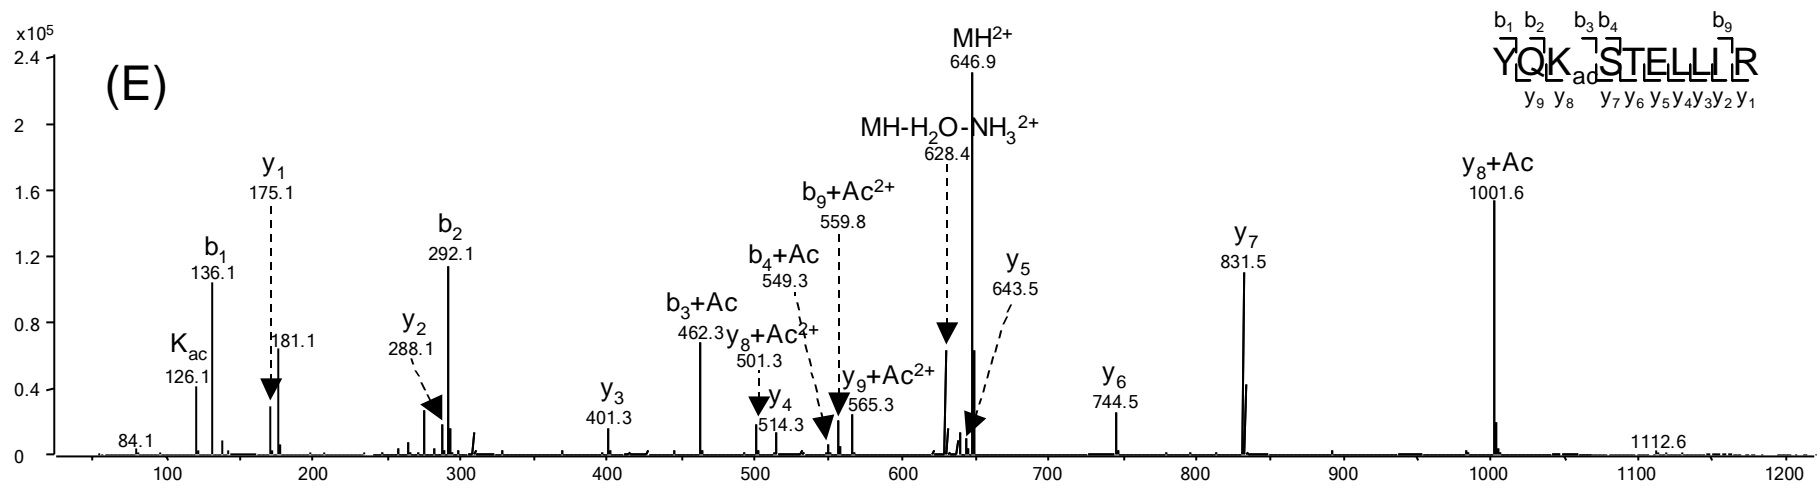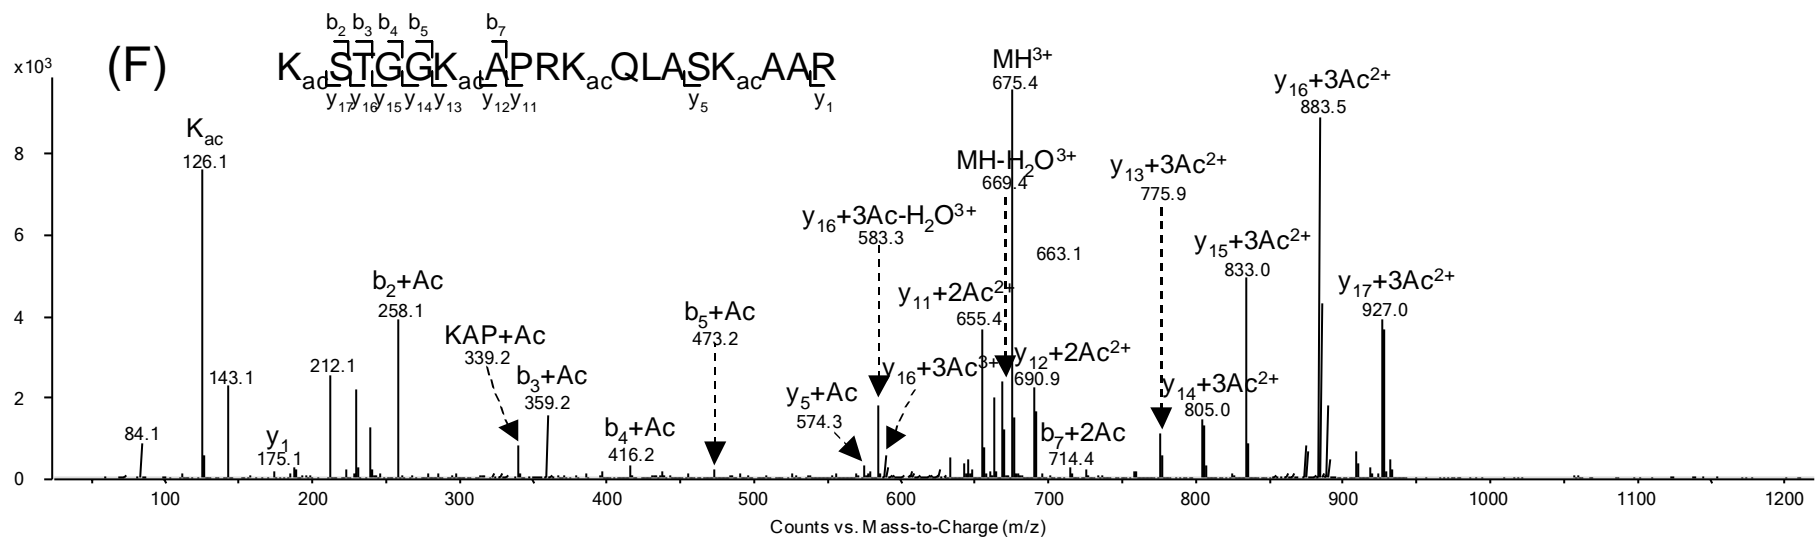

Figure S5

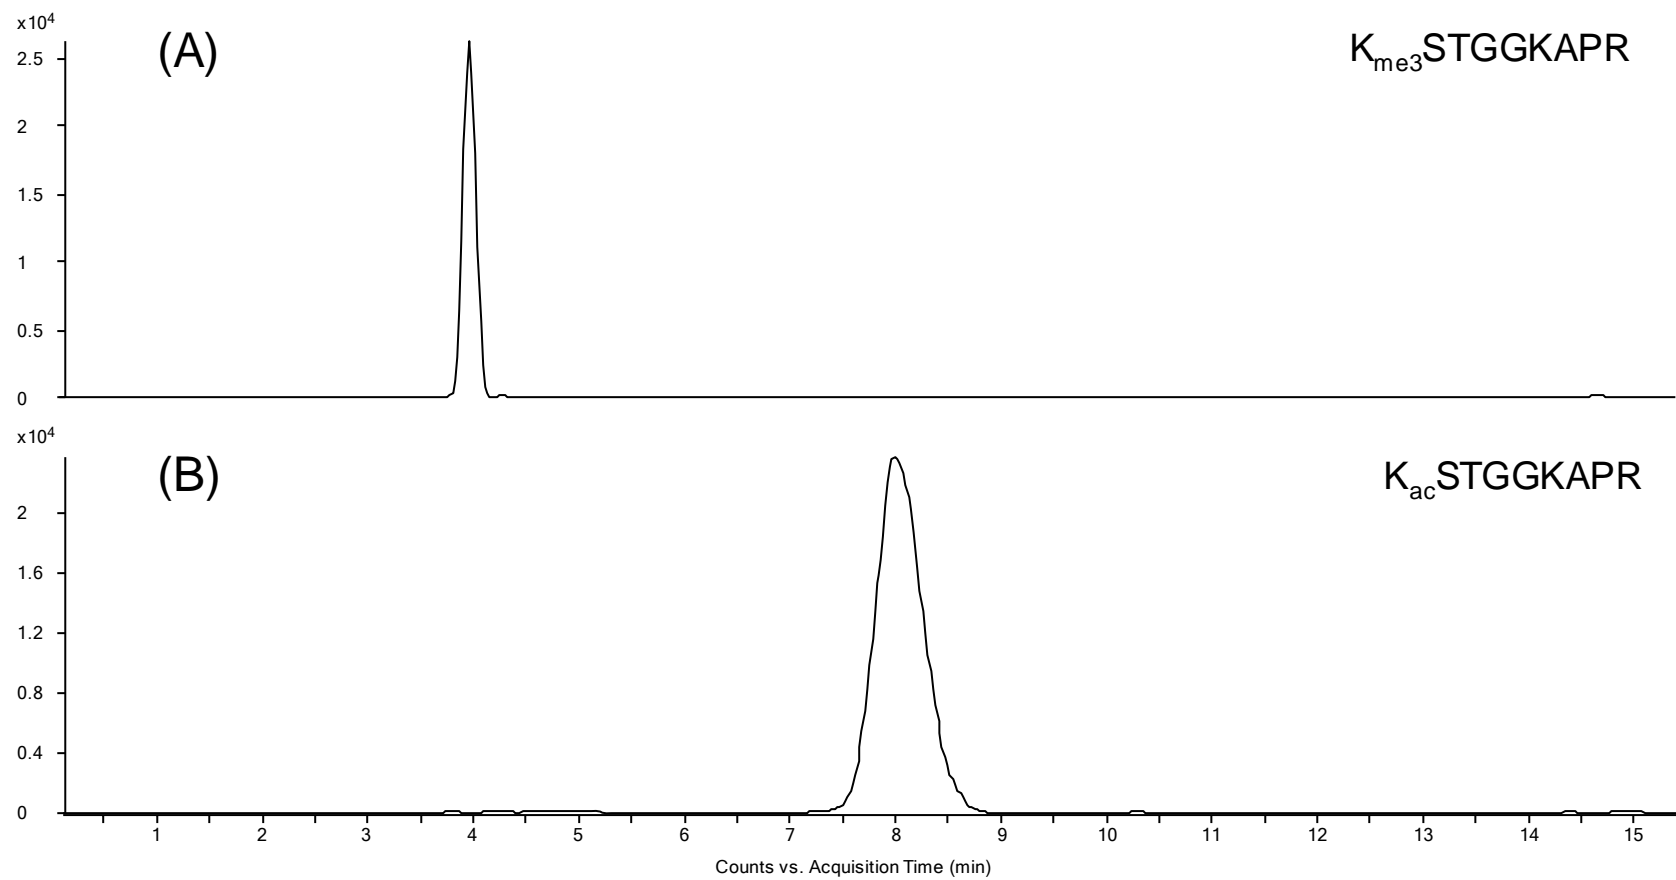

Figure S6

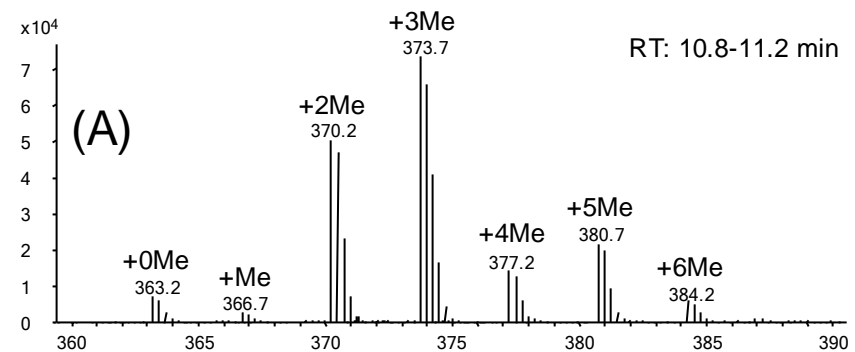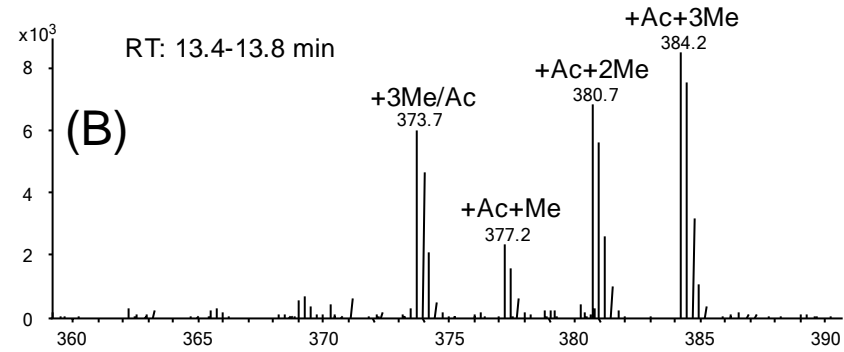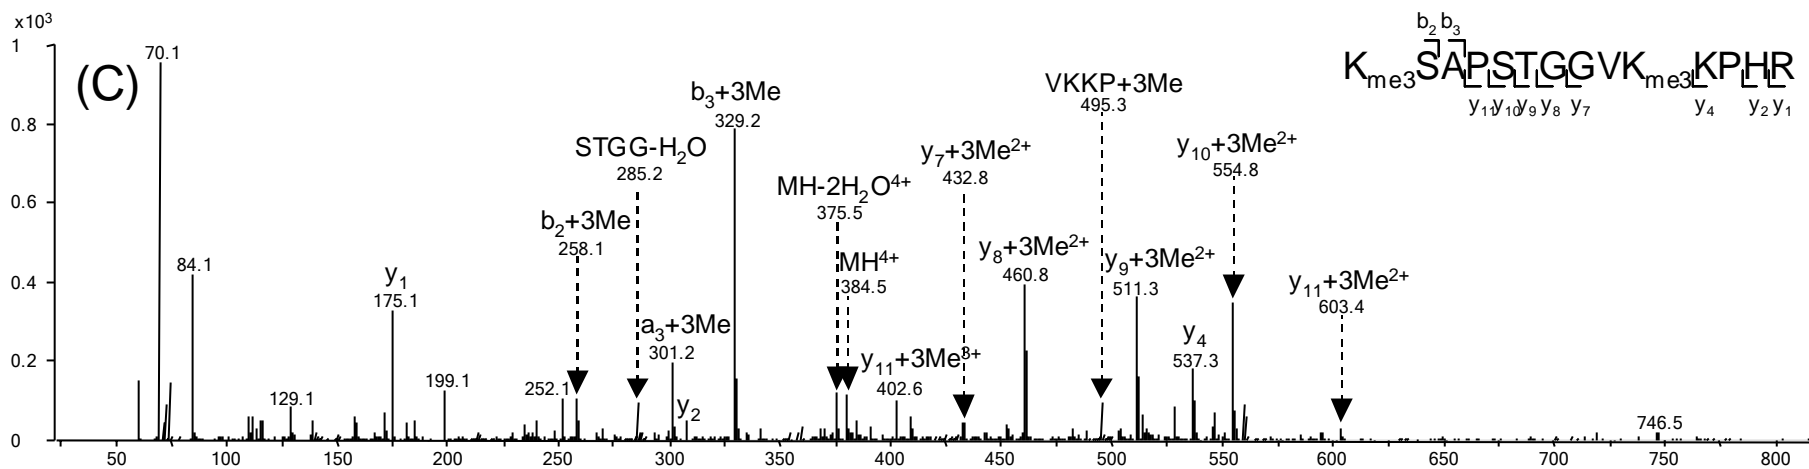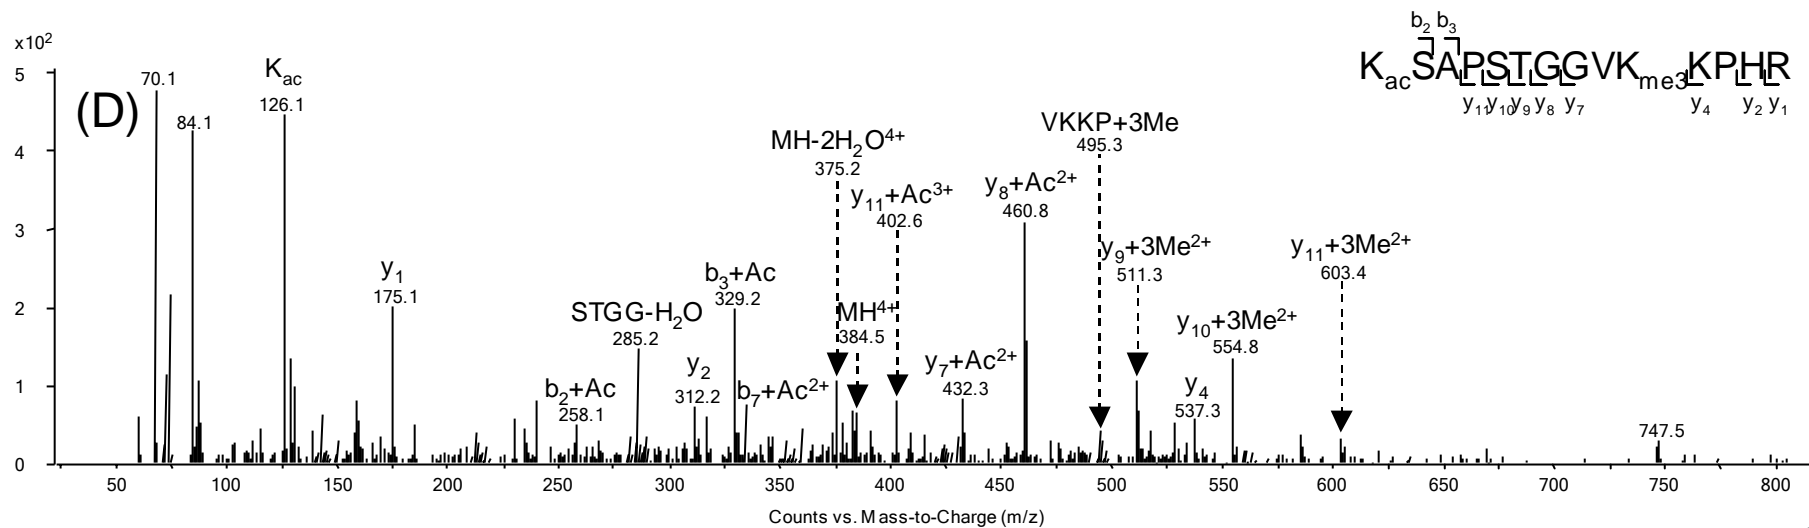

Counts vs. Mass-to-Charge (m/z)

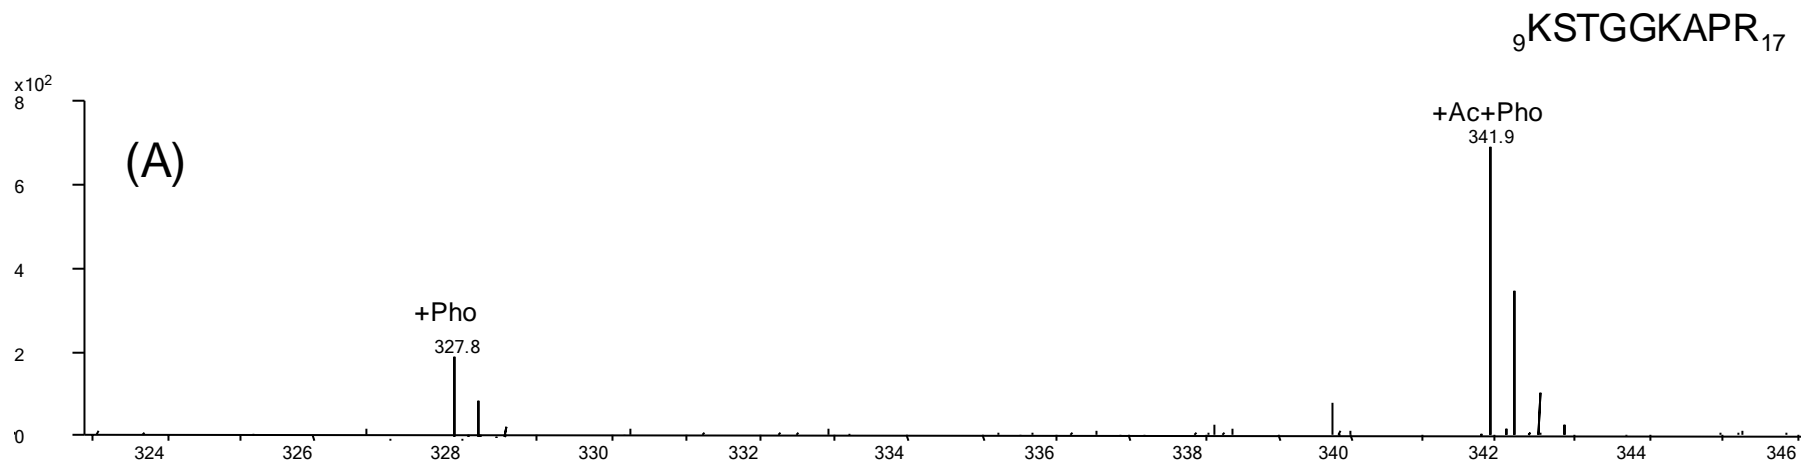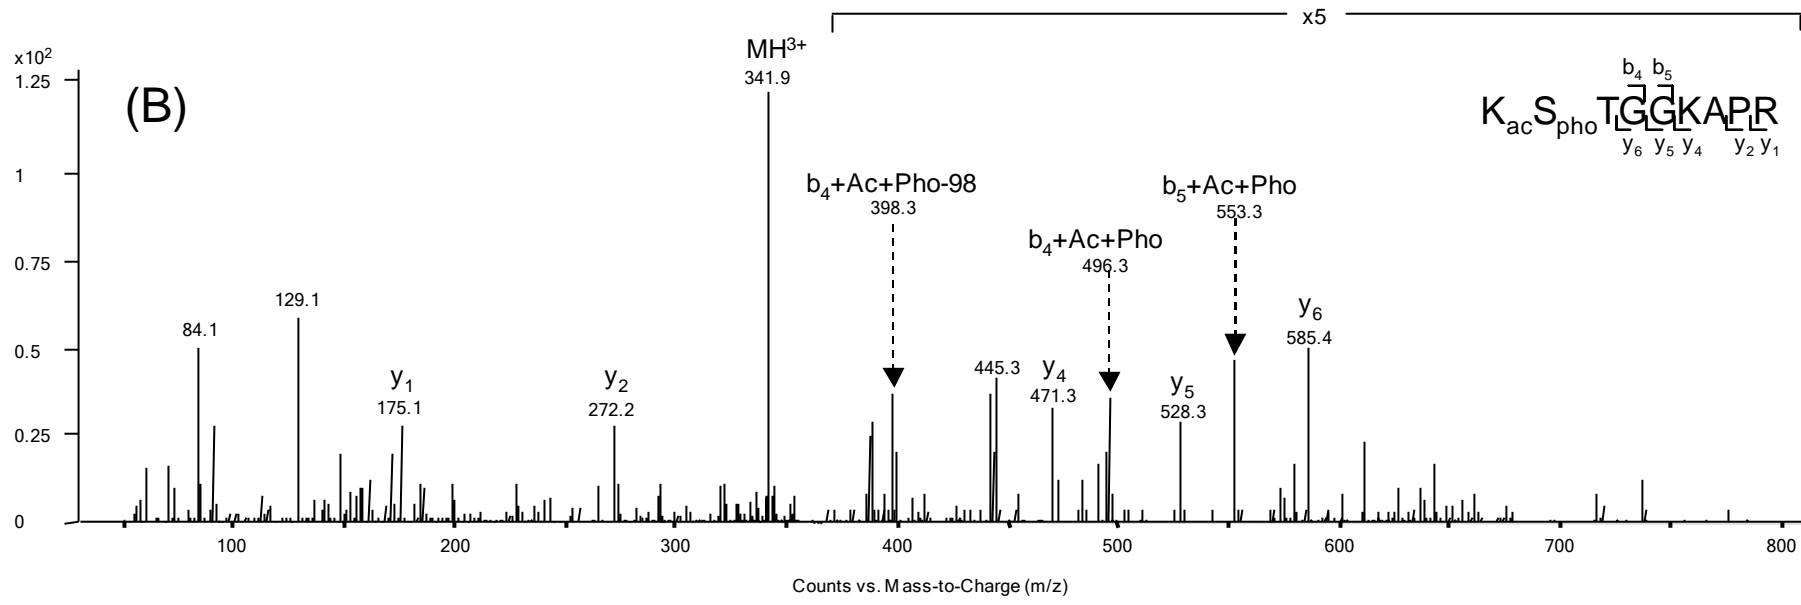

Figure S8

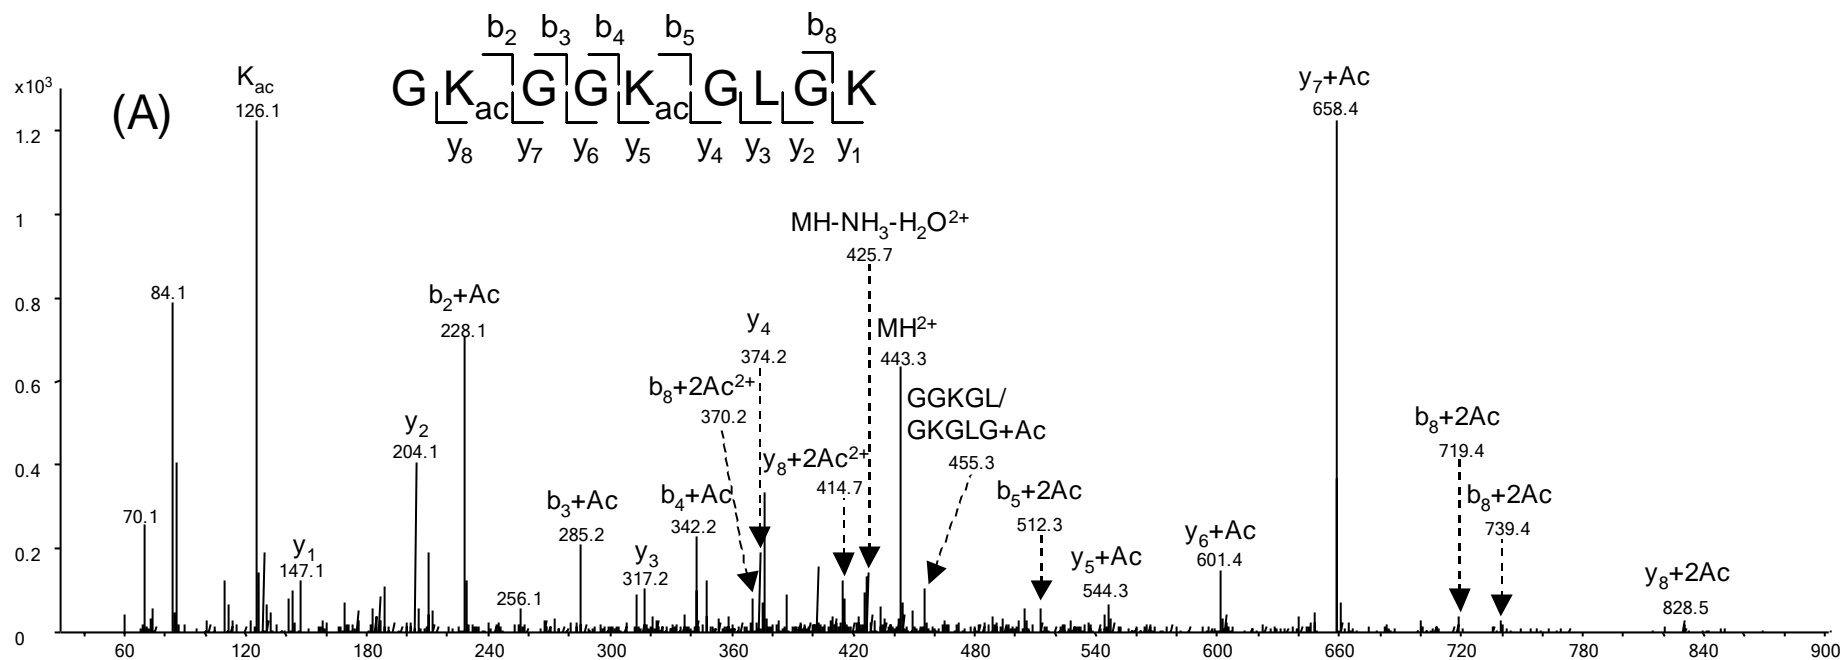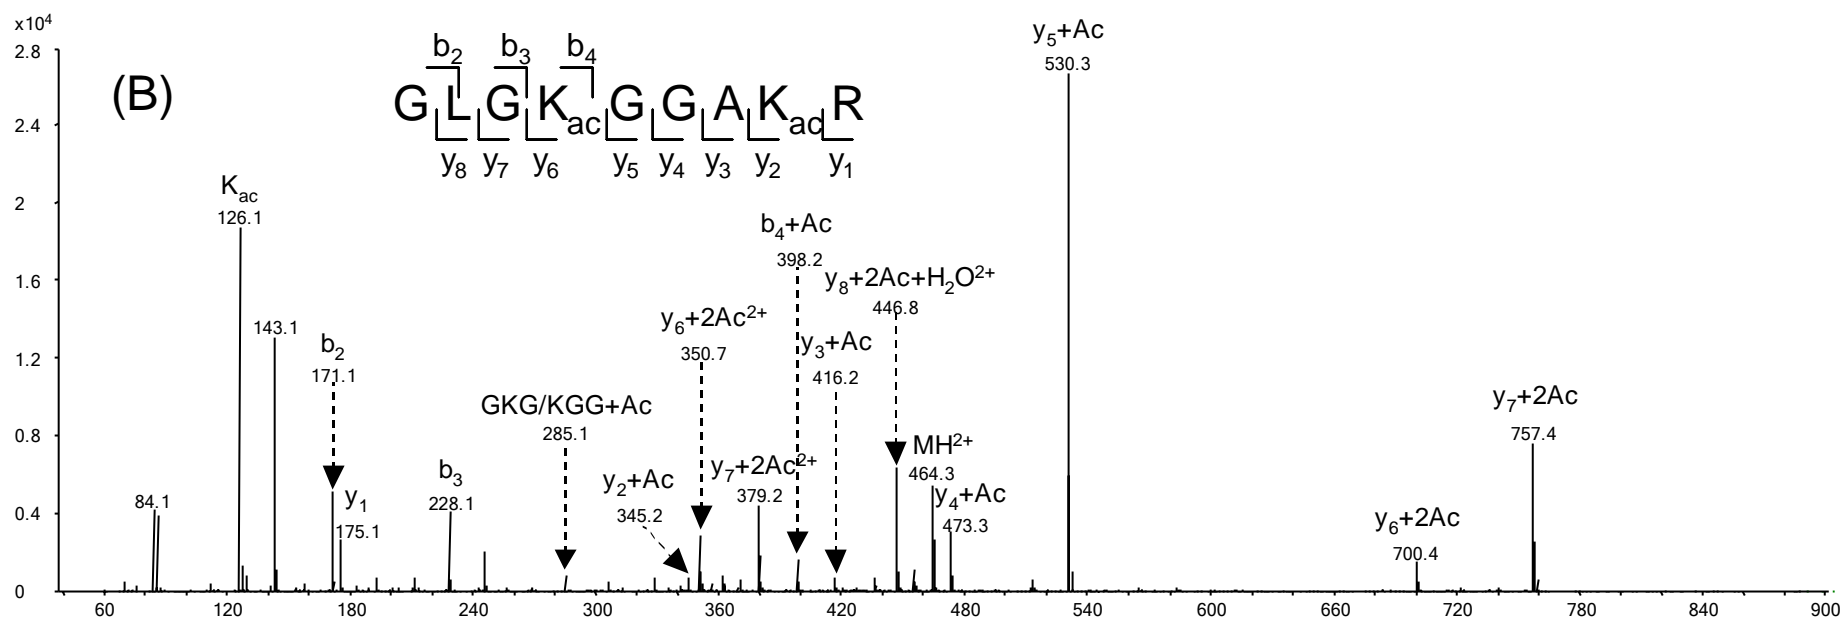

Counts vs. Mass-to-Charge ( $m/z$ )

Figure S9

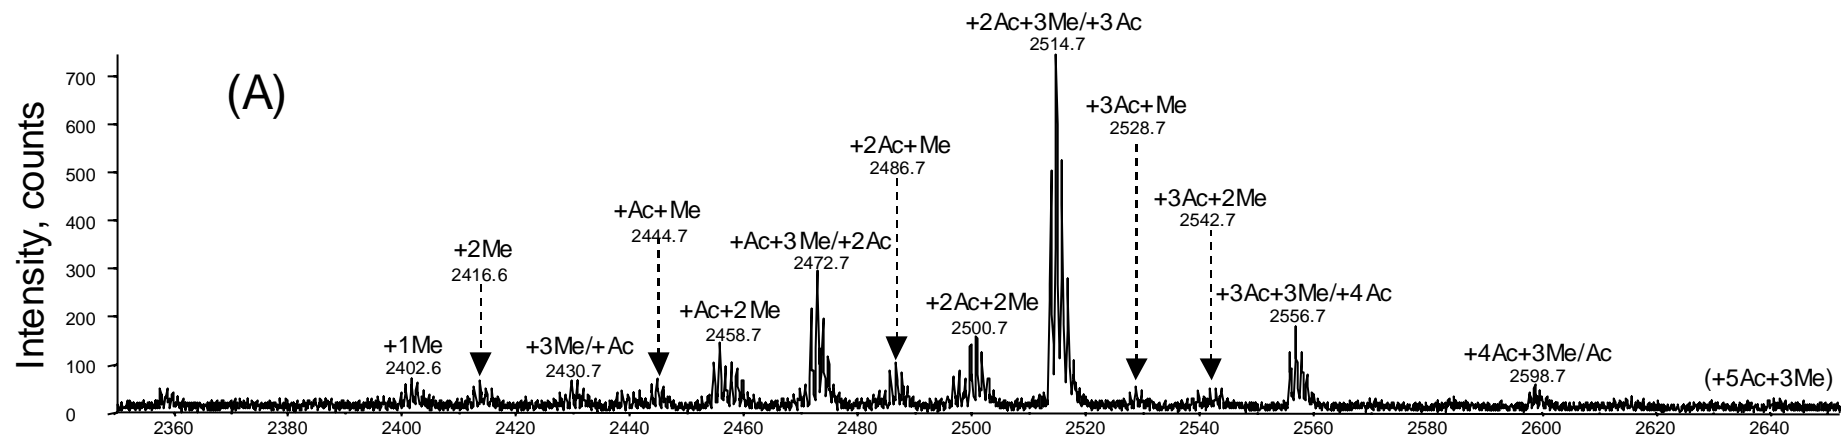

Figure S10

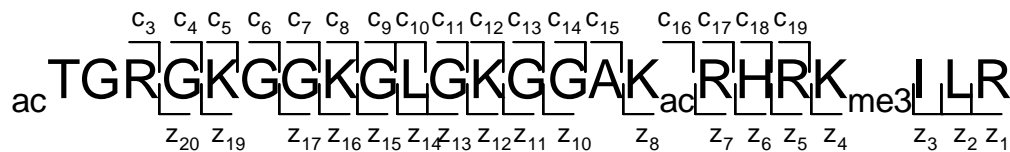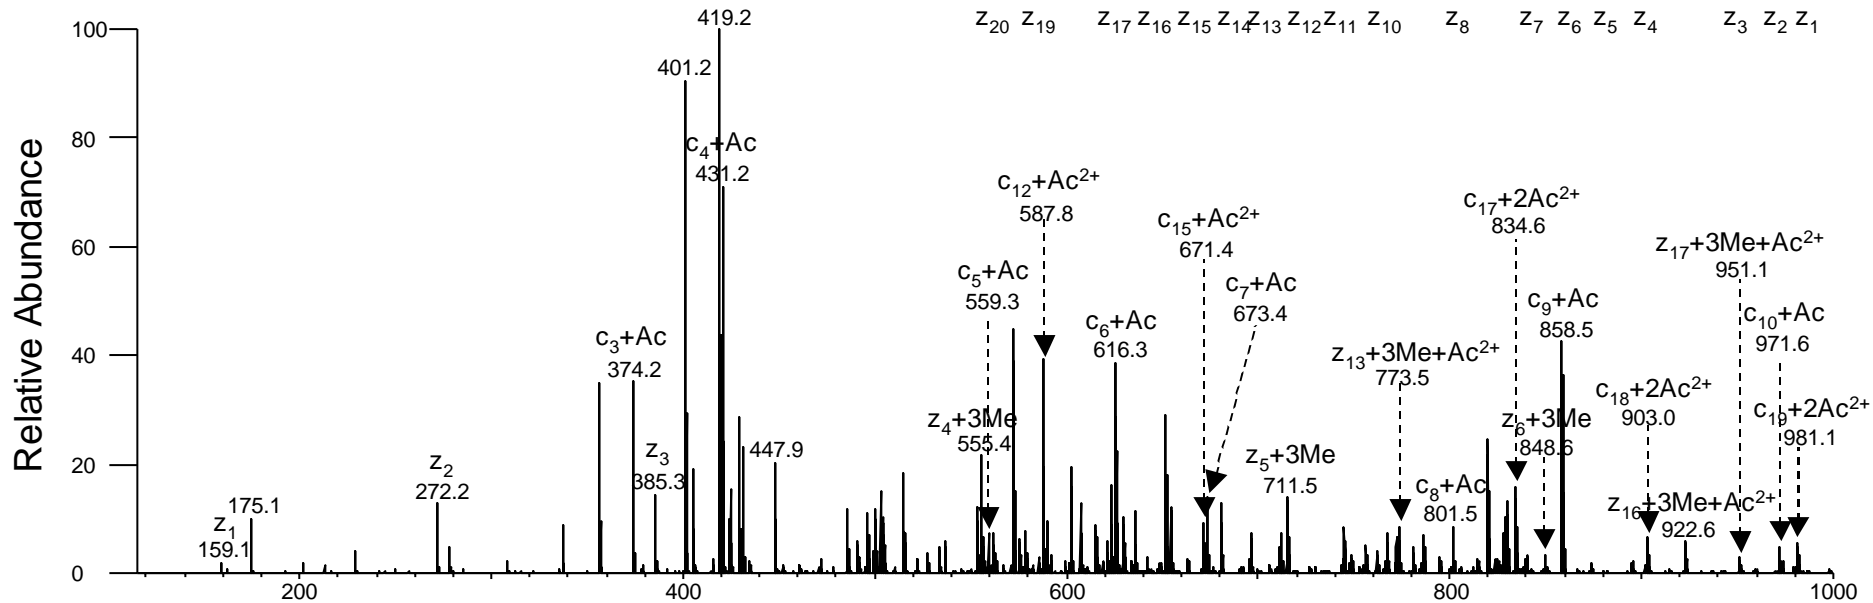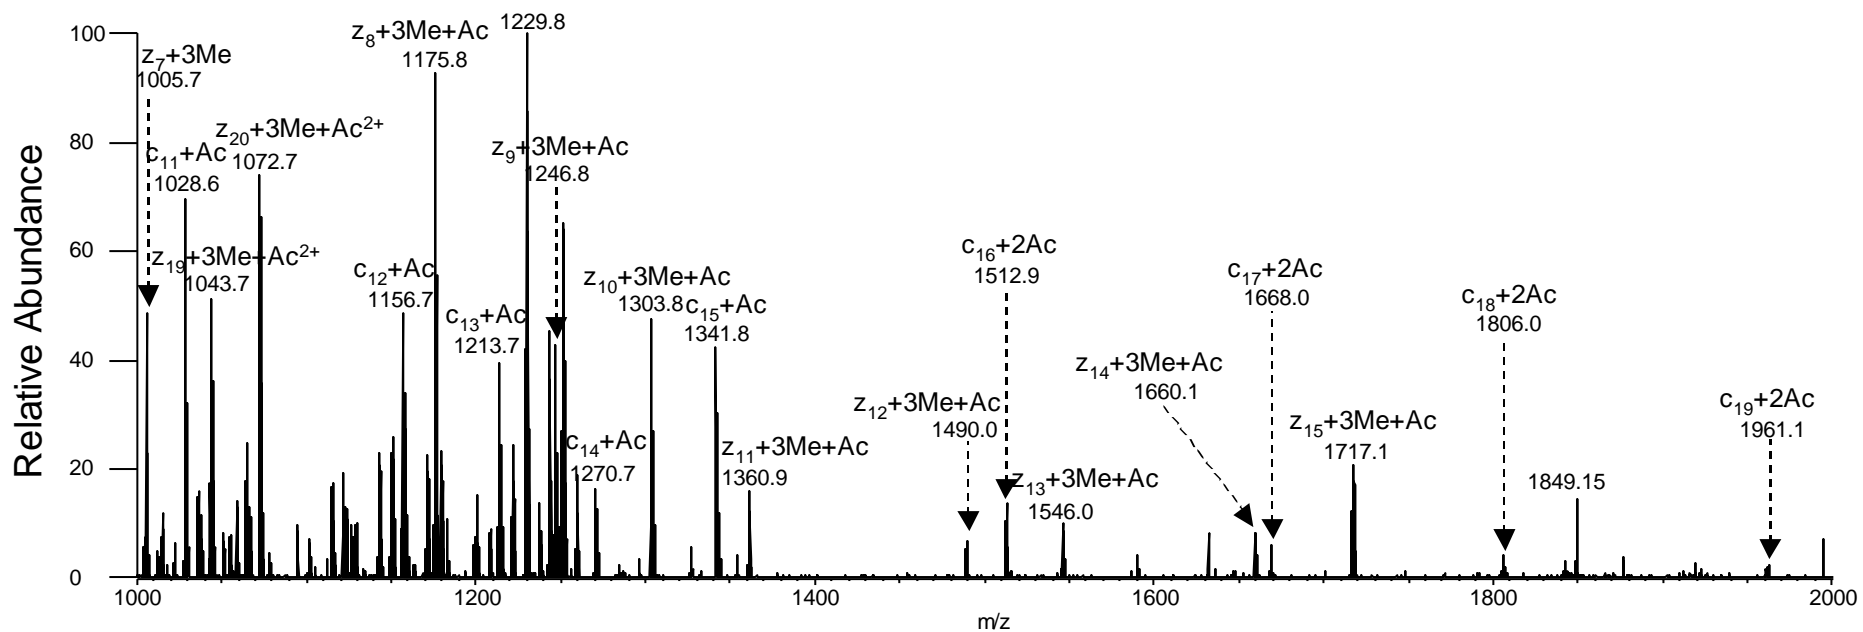

Supplement: NIHMS217960-supplement-1_si_001.pdf [file NIHMS217960-supplement-1_si_001.pdf]
